# Supplementary material for: Collision Mortality Has No Discernible Effect on Population Trends of North American Birds
Source: PLoS One. 2011 Sep 9;6(9):e24708. doi: 10.1371/journal.pone.0024708 (PMC3170378; doi:10.1371/journal.pone.0024708)
Supplement: Table S1 — List of North American landbird species that collide most frequently with towers (T1-T5) and buildings (B1-B5) (the “super colliders”), as well as the top five super avoiders (T188-184, B147-143). (PDF) [file pone.0024708.s003.pdf]

**Table S1:** List of North American landbird species that collide most frequently with towers (T1-T5) and buildings (B1-B5) (the “super colliders”), as well as the top five super avoiders (T188-184, B147-143).

| Rank | Common name             | Scientific name                 | Family       | Migrant | Collisions | Pop. size   | Resid | Risk | Trend       |
|------|-------------------------|---------------------------------|--------------|---------|------------|-------------|-------|------|-------------|
| T1   | Bay-breasted warbler    | <i>Dendroica castanea</i>       | Parulidae    | LD-N    | 10,396     | 2,700,000   | 2.37  | 236  | -0.1        |
| T2   | Golden-winged warbler   | <i>Vermivora chrysoptera</i>    | Parulidae    | LD-U    | 542        | 210,000     | 2.29  | 196  | <b>-2.3</b> |
| T3   | Connecticut warbler     | <i>Oporornis agilis</i>         | Parulidae    | LD-U    | 2,624      | 1,080,000   | 2.23  | 171  | -0.8        |
| T4   | Bachman's sparrow       | <i>Peucaea aestivalis</i>       | Emberizidae  | SD-U    | 74         | 300,000     | 2.01  | 103  | <b>-2.8</b> |
| T5   | Black-thr. blue warbler | <i>Dendroica caerulescens</i>   | Parulidae    | LD-U    | 2,061      | 2,000,000   | 1.98  | 96   | <b>2.4</b>  |
| B1   | Swamp sparrow           | <i>Melospiza Georgiana</i>      | Emberizidae  | SD-N    | 3,941      | 4,500,000   | 1.76  | 57   | 0.7         |
| B2   | Brown creeper           | <i>Certhia americana</i>        | Certhiidae   | SD-U    | 1,039      | 2,000,000   | 1.68  | 48   | <b>2.7</b>  |
| B3   | Black-thr. blue warbler | <i>Dendroica caerulescens</i>   | Parulidae    | LD-U    | 588        | 1,800,000   | 1.61  | 41   | <b>2.4</b>  |
| B4   | Nelson's sparrow        | <i>Ammodramus nelson</i>        | Emberizidae  | SD-N    | 44         | 100,000     | 1.41  | 26   | 0.2         |
| B5   | Fox sparrow             | <i>Passerella iliaca</i>        | Emberizidae  | SD-N    | 1,819      | 4,800,000   | 1.40  | 25   | 1.5         |
| T188 | Horned lark             | <i>Eremophila alpestris</i>     | Alaudidae    | SD-D    | 0          | 49,500,000  | -2.84 | 688  | <b>-2.9</b> |
| T187 | American robin          | <i>Turdus migratorius</i>       | Turdidae     | SD-D    | 6          | 217,000,000 | -2.69 | 495  | <b>0.3</b>  |
| T186 | Cliff swallow           | <i>Petrochelidon pyrrhonota</i> | Hirundinidae | LD-D    | 1          | 32,000,000  | -2.42 | 261  | <b>-1.6</b> |
| T185 | Black-capped chickadee  | <i>Poecile atricapillus</i>     | Paridae      | Non-D   | 0          | 23,800,000  | -2.38 | 240  | <b>1.7</b>  |
| T184 | Common grackle          | <i>Quiscalus quiscula</i>       | Icteridae    | SD-D    | 4          | 67,900,000  | -2.35 | 222  | <b>-1.9</b> |
| B147 | Horned lark             | <i>Eremophila alpestris</i>     | Alaudidae    | SD-D    | 0          | 19,800,000  | -2.32 | 208  | <b>-2.9</b> |
| B146 | Lapland longspur        | <i>Calcarius lapponicus</i>     | Calcariidae  | SD-B    | 1          | 35,000,000  | -2.26 | 183  | NA          |
| B145 | Cliff swallow           | <i>Petrochelidon pyrrhonota</i> | Hirundinidae | LD-D    | 0          | 16,000,000  | -2.22 | 168  | <b>-1.6</b> |
| B144 | Northern mockingbird    | <i>Mimus polyglottos</i>        | Mimidae      | Non-D   | 0          | 14,800,000  | -2.19 | 155  | <b>-0.6</b> |
| B143 | Tree swallow            | <i>Tachycineta bicolor</i>      | Hirundinidae | SD-D    | 0          | 10,000,000  | -2.02 | 105  | <b>-1.4</b> |

Migrant status includes distance: long-distance (LD), short-distance (SD) or non-migratory (Non) and timing: nocturnal (N), diurnal (D), both (B) or unknown (U) [27,28]. Collisions are number of observed mortalities for each species. Population size [12] is adjusted to eastern North America. Residual is the deviation from the regression of  $\log_{10}(\text{collisions} + 1)$  on  $\log_{10}$  population size; site overlap was also included for tower mortality. For super colliders (top 10 species) risk is  $10^{\text{Resid}}$  and reflects the risk multiplier (e.g. bay-breasted warblers are at 236 times greater risk than the average bird); for super avoiders risk is  $10^{-\text{Resid}}$  and reflects lower vulnerability (e.g. horned larks are 688 times less likely to collide with a tower than the average bird). Trend is the long-term (1966-2009) population trend expressed as percent change per year [14]; values in bold are statistically significant.
